# Supplementary material
Source: Research Square preprint supplement (doi:10.21203/rs.3.rs-9356764/v1)
Supplement: Supplementary file 1 [file 49999f7255bdfbeb57b2aa59.docx]

| **Students** | **Mean** | **Standard Deviation** | **Skewness**  **(*SE* = .107)** | **Kurtosis**  **(*SE* = .214)** | **Min – Max** | **Reliability (Cronbach’s Alpha, McDonald’s Omega)** |
| --- | --- | --- | --- | --- | --- | --- |
| QBS_S_Satisfaction and Recognition | 5.773 | 1.880 | -.589 | - .290 | 0.00 – 8.00 | .795, .788 |
| QBS_S_Relationships with Teachers | 7.353 | 2.333 | -.746 | - .113 | 0.00 – 10.00 | .797, .796 |
| QBS_S_Relationships with Classmates | 7.565 | 2.350 | - 1.120 | .976 | 0.00 – 10.00 | .837, .835 |
| QBS_S_Emotional Attitude in School | 4.202 | 1.936 | - .081 | - .597 | 0.00 – 8.00 | .535, .525 |
| QBS_S_Sense of Self-Efficacy | 8.173 | 2.304 | - .203 | - .408 | 0.00 – 12.00 | .698, .687 |
| QBS_S_TOT | 33.066 | 1.186 | - .428 | - .127 | 8.00 – 47.00 | .807, § |
| AMOS_Flexibility | 14.210 | 2.033 | - .070 | - .481 | 9.00 – 20.00 | .197, § |
| AMOS_Concentration | 15.164 | 2.954 | - .147 | - .379 | 7.00 – 21.00 | .712, .706 |
| ISC_Teacher Support | 23.436 | 4.118 | - .590 | - .021 | 10.00 – 30.00 | .753, .747 |
| ISC_Rules | 20.721 | 2.920 | - .622 | .001 | 10.00 - 25.00 | .652, .636 |
| ISC_Commitment | 20.075 | 3.188 | - .572 | .328 | 7.00 – 25.00 | .717, .719 |
| ISC_Negative Peer Interaction | 12.270 | 3.541 | .396 | .325 | 5.00 – 24.00 | .771, .760 |
| ISC_Positive Peer Interaction | 20.129 | 3.386 | - .703 | .401 | 7.00 – 25.00 | .742, .722 |
| ISC_Harshness | 12.998 | 3.330 | .346 | .115 | 5.00 – 23.00 | .626, .614 |
| ISC_Decision | 12.790 | 3.887 | .152 | - .447 | 5.00 – 24.00 | .713, .703 |
| ISC_Innovation | 13.709 | 3.002 | - .215 | - .132 | 4.00 – 20.00 | .679, .684 |
| Innovation at School Measure_S | 45.59 | 12.64 | - .223 | - .649 | 14.00 – 70.00 | .901, .903 |

**Table 1**

Note: § = Omega cannot be estimated due to negative or zero item covariances. This may be due to items that require reverse scoring or to violations of the model’s assumptions.

*Descriptive Statistics Students’ Questionnaire*

**Table 2**

| **PARENTS** | **Mean** | **Standard Deviation** | **Skewness**  **(SE = .134)** | **Kurtosis**  **(SE = .267)** | **Min – Max** | **Reliability (Cronbach’s Alpha, McDonald’s Omega)** |
| --- | --- | --- | --- | --- | --- | --- |
| QBS_P_Evaluation of Learning | 16.702 | 3.423 | - 1.443 | 2.085 | 4.00 – 20.00 | .855, .769 |
| QBS_P_Child’s Emotional Difficulties | 7.883 | 2.252 | - 1.158 | .751 | 0.00 – 10.00 | .800, .785 |
| QBS_P_Child’s Awareness | 5.048 | 1.770 | - .142 | - .281 | 0.00 – 8.00 | .687, .672 |
| QBS_P_Relationship with Teachers | 6.051 | 1.776 | - .449 | - .728 | 0.00 – 8.00 | .792, .734 |
| QBS_P_TOT | 56.690 | 8.988 | - .838 | .705 | 25.00 – 72.00 | .889, .873 |
| Innovation at School Measure_P | 46.35 | 11.75 | - .415 | - .559 | 15.00 – 65.00 | .960, .960 |

*Descriptive Statistics Parents' Questionnaire*

**Table 3**

*Descriptive Statistics Teachers' Questionnaire*

| **TEACHERS** | **Mean** | **Standard Deviation** | **Skewness**  **(SE = .142)** | **Kurtosis**  **(SE = .284)** | **Min – Max** | **Reliability (Cronbach’s Alpha, McDonald’s Omega)** |
| --- | --- | --- | --- | --- | --- | --- |
| QBS_T_Evaluation of Learning | 16.553 | 4.155 | - 1.347 | 1.352 | 0.00 – 20.00 | .887, .910 |
| QBS_T_Student’s Emotional Difficulties | 7.915 | 2.257 | - 1.308 | 1.448 | 0.00 – 10.00 | .822, .785 |
| QBS_T_Student’s Awareness | 4.304 | 1.841 | - .291 | - .377 | 0.00 – 8.00 | .719, .656 |
| QBS_T_Relationship with Parents | 5.652 | 1.994 | - .423 | - .685 | 0.00 – 8.00 | .826, .794 |
| QBS_T_TOT | 57.642 | 9.631 | - .684 | - .158 | 28.00 – 72.00 | .906, .905 |

**Table 4**

*Pearson Correlations*

|  | **1.** | **2.** | **3.** | **4.** | **5.** | **6.** | **7.** | **8.** | **9.** | **10.** | **11.** | **12.** | **13.** | **14.** | **15.** | **16.** | **17.** | **18.** | **19.** | **20.** | **21.** | **22.** | **23.** | **24.** | **25.** | **26.** | **27.** | **28.** | **29.** | **30.** |
| --- | --- | --- | --- | --- | --- | --- | --- | --- | --- | --- | --- | --- | --- | --- | --- | --- | --- | --- | --- | --- | --- | --- | --- | --- | --- | --- | --- | --- | --- | --- |
| **1. QBS_T_Personal Experience** | **--** |  |  |  |  |  |  |  |  |  |  |  |  |  |  |  |  |  |  |  |  |  |  |  |  |  |  |  |  |  |
| **2. QBS_T_Evaluation of Learning** | **.650**** |  |  |  |  |  |  |  |  |  |  |  |  |  |  |  |  |  |  |  |  |  |  |  |  |  |  |  |  |  |
| **3. QBS_T_Student’s Emotional Difficulties** | **.405**** | **.416**** |  |  |  |  |  |  |  |  |  |  |  |  |  |  |  |  |  |  |  |  |  |  |  |  |  |  |  |  |
| **4. QBS_T_Student’s Awareness** | **.398**** | **.389**** | **- .046** |  |  |  |  |  |  |  |  |  |  |  |  |  |  |  |  |  |  |  |  |  |  |  |  |  |  |  |
| **5. QBS_T_Relationship with Parents** | **.520**** | **.514**** | **.267**** | **.562**** |  |  |  |  |  |  |  |  |  |  |  |  |  |  |  |  |  |  |  |  |  |  |  |  |  |  |
| **6. QBS_T_TOT** | **.828**** | **.884**** | **.569**** | **.572**** | **.739**** |  |  |  |  |  |  |  |  |  |  |  |  |  |  |  |  |  |  |  |  |  |  |  |  |  |
| **7. QBS_P_Personal Experience** | **.261**** | **.269**** | **.129** | **.138** | **.195**** | **.286**** |  |  |  |  |  |  |  |  |  |  |  |  |  |  |  |  |  |  |  |  |  |  |  |  |
| **8. QBS_P_ Evaluation of Learning** | **.400**** | **.513**** | **.109** | **.212**** | **.246**** | **.449**** | **.577**** |  |  |  |  |  |  |  |  |  |  |  |  |  |  |  |  |  |  |  |  |  |  |  |
| **9. QBS_P_Child’s Emotional Difficulties** | **.114** | **.231**** | **.248**** | **.111** | **.162*** | **.247**** | **.587**** | **.432**** |  |  |  |  |  |  |  |  |  |  |  |  |  |  |  |  |  |  |  |  |  |  |
| **10. QBS_P_Child’s Awareness** | **.207**** | **.180*** | **.032** | **.038** | **.128** | **.175*** | **.266**** | **.196**** | **- .090** |  |  |  |  |  |  |  |  |  |  |  |  |  |  |  |  |  |  |  |  |  |
| **11. QBS_P_ Relationship with Teachers** | **.041** | **- .020** | **- .048** | **.064** | **.123** | **0.029** | **.244**** | **.198**** | **.047** | **.415**** |  |  |  |  |  |  |  |  |  |  |  |  |  |  |  |  |  |  |  |  |
| **12. QBS_P_TOT** | **.323**** | **.375**** | **.148*** | **.177*** | **.256**** | **.373**** | **.873**** | **.801**** | **.645**** | **.439**** | **.465**** |  |  |  |  |  |  |  |  |  |  |  |  |  |  |  |  |  |  |  |
| **13. AMOS_Flexibility** | **.159*** | **.182**** | **.088** | **.030** | **.088** | **.166**** | **.051** | **.029** | **.051** | **.083** | **.115*** | **.084** |  |  |  |  |  |  |  |  |  |  |  |  |  |  |  |  |  |  |
| **14. AMOS_Concentration** | **.202**** | **.309**** | **.083** | **.198**** | **.196**** | **.286**** | **.230**** | **.337**** | **.170**** | **.093** | **.112*** | **.302**** | **.031** |  |  |  |  |  |  |  |  |  |  |  |  |  |  |  |  |  |
| **15. ISC_Teacher Support** | **.175**** | **.063** | **.010** | **.061** | **- .004** | **.087** | **.230**** | **.164**** | **.119*** | **.156**** | **.250**** | **.265**** | **- .040** | **.327**** |  |  |  |  |  |  |  |  |  |  |  |  |  |  |  |  |
| **16. ISC_Rules** | **.083** | **.041** | **- .061** | **.068** | **- .010** | **.036** | **.117*** | **.127*** | **.050** | **.105** | **.195**** | **.167**** | **.009** | **.279**** | **.556**** |  |  |  |  |  |  |  |  |  |  |  |  |  |  |  |
| **17. ISC_Commitment** | **.068** | **.017** | **- .074** | **.069** | **- .044** | **.012** | **.181**** | **.137*** | **.026** | **.176**** | **.186**** | **.202**** | **- .051** | **.321**** | **.452**** | **.439**** |  |  |  |  |  |  |  |  |  |  |  |  |  |  |
| **18. ISC_Negative Peer Interaction** | **- .269**** | **- .205**** | **- .136*** | **- .078** | **- .075** | **- .223**** | **- .207**** | **- .166**** | **- .199**** | **- .026** | **- .079** | **- .217**** | **- .031** | **- .209**** | **- .285**** | **- .243**** | **- .243**** |  |  |  |  |  |  |  |  |  |  |  |  |  |
| **19. ISC_Positive Peer Interaction** | **.159*** | **.114** | **.035** | **.062** | **- .009** | **.110** | **.153**** | **.147**** | **.030** | **.135*** | **.157**** | **.182**** | **.036** | **.262**** | **.516**** | **.416**** | **.453**** | **- .417**** |  |  |  |  |  |  |  |  |  |  |  |  |
| **20. ISC_Harshness** | **- .148*** | **- .142*** | **- .103** | **- .035** | **- .040** | **- .140*** | **- .144*** | **- .108** | **- .151**** | **- .034** | **- .134*** | **- .170**** | **.023** | **- .217**** | **-.271**** | **-0.028** | **-0.06** | **.289**** | **- .110*** |  |  |  |  |  |  |  |  |  |  |  |
| **21. ISC_Decision** | **.013** | **- .097** | **- .036** | **- .079** | **- .173**** | **- .098** | **.065** | **.088** | **.017** | **.038** | **.131*** | **.097** | **- .026** | **.148**** | **.493**** | **.251**** | **.195**** | **- .048** | **.290**** | **- .161**** |  |  |  |  |  |  |  |  |  |  |
| **22. ISC_Innovation** | **.068** | **- .057** | **- .021** | **- .058** | **- .111** | **- .046** | **.184**** | **.141*** | **.089** | **.049** | **.172**** | **.194**** | **- .019** | **.199**** | **.613**** | **.464**** | **.348**** | **- .146**** | **.464**** | **- .091*** | **.525**** |  |  |  |  |  |  |  |  |  |
| **23. QBS_S_Satisfaction and Recognition** | **.112** | **.259**** | **- .024** | **.199**** | **.232**** | **.222**** | **.286**** | **.349**** | **.116*** | **.221**** | **.236**** | **. 365**** | **.009** | **.450**** | **.330**** | **.231**** | **.364**** | **- .233**** | **.293**** | **- .183**** | **.114**** | **.251**** |  |  |  |  |  |  |  |  |
| **24. QBS_S_Relationships with Teachers** | **.104** | **.088** | **- .047** | **.138*** | **.097** | **.101** | **.161**** | **.120*** | **.095** | **.126*** | **.279**** | **.214**** | **- .024** | **.356**** | **.617**** | **.405**** | **.401**** | **- .250**** | **.382**** | **- .299**** | **.314**** | **.456**** | **.456**** |  |  |  |  |  |  |  |
| **25. QBS_S_Relationships with Classmates** | **.179**** | **.166**** | **.143*** | **.030** | **.049** | **.170**** | **.174**** | **.217**** | **.106** | **.011** | **.167**** | **.214**** | **.029** | **.183**** | **.250**** | **.198**** | **.246**** | **- .523**** | **.538**** | **- .067** | **.088*** | **.190**** | **.294**** | **.350**** |  |  |  |  |  |  |
| **26. QBS_S_Emotional Attitude in School** | **.187**** | **.147*** | **.152*** | **.070** | **.189**** | **.202**** | **.214**** | **.158**** | **.363**** | **.027** | **.072** | **.257**** | **.060** | **.185**** | **.054** | **.012** | **.015** | **- .269**** | **.076** | **- .231**** | **.007** | **.032** | **.170**** | **.113*** | **.185**** |  |  |  |  |  |
| **27. QBS_S_Sense of Self-Efficacy** | **.237**** | **.324**** | **.143*** | **.134*** | **.247**** | **.314**** | **.259**** | **.283**** | **.219**** | **.127*** | **.181**** | **.326**** | **.163**** | **.372**** | **.166**** | **.168**** | **.252**** | **- .228**** | **.290**** | **- .098*** | **.049** | **.193**** | **.455**** | **.321**** | **.361**** | **.268**** |  |  |  |  |
| **28. QBS_S_TOT** | **.249**** | **.294**** | **.113** | **.169**** | **.239**** | **.302**** | **.328**** | **.339**** | **.266**** | **.154**** | **.287**** | **.414**** | **.073** | **.462**** | **.436**** | **.314**** | **.391**** | **- .459**** | **.490**** | **- .261**** | **.178**** | **.346**** | **.698**** | **.692**** | **.683**** | **.497**** | **.734**** |  |  |  |
| **29.**  **Innovation at School Measure_S** | **.139*** | **.040** | **.003** | **- .035** | **- .026** | **.043** | **.237**** | **.189**** | **.114*** | **.119*** | **.186**** | **.256**** | **.031** | **.355**** | **.631**** | **.382**** | **.385**** | **- .209**** | **.474**** | **- .245**** | **.496**** | **.647**** | **.330**** | **.536**** | **.260**** | **.045** | **.244**** | **.436**** |  |  |
| **30.**  **Innovation at School Measure_P** | **- .050** | **- .113** | **- .067** | **- .073** | **.010** | **- .091** | **.312**** | **.207**** | **.177**** | **.284**** | **.499**** | **.405**** | **.050** | **.087** | **.217**** | **.133*** | **.120*** | **- .092** | **.193**** | **- .050** | **.274**** | **.341**** | **.148**** | **.201**** | **.119*** | **.109** | **.110** | **.209**** | **.334**** | **--** |

Note: * = p < .05, ** = p < .01 (two-tailed)

**Table 5**

*General Linear Model Between Students' Innovation at School Measure and QBS Subscales*

| **QBS_STUDENTS** | Multivariate model | Univariate model | Tukey - Post-hoc |
| --- | --- | --- | --- |
| Satisfaction and Recognition of school results | F(10, 1026) = 15.340, *p* < .001, *η²* = .13 | F(2, 516) = 24.223, *p* < .001, *η²* = .09 | LowInn < MediumInn < HighInn |
| Relationships with Teachers | F(2, 516) = 70.304, *p* < .001, *η²* = .21 | LowInn < MediumInn < HighInn |
| Relationships with Classmates | F(2, 516) = 13.651, *p* < .001, *η²* = .05 | LowInn < MediumInn < HighInn |
| Emotional Attitude at School | F(2, 516) = 5.356, *p* = .005, *η²* = .02 | MediumInn < HighInn |
| Sense of Self-Efficacy | F(2, 516) = 15.371, *p* < .001, *η²* = .06 | LowInn, MediumInn < HighInn |
| **QBS_PARENTS** |  |  |  |
| Personal Experience in relation to the child's difficulties | F(10, 606) = 3.353, *p* < .001, *η²* = .05 | F(2, 308) = 10.769, *p* < .001, *η²* = .07 | LowInn < MediumInn, HighInn |
| Evaluation of Learning processes | F(2, 308) = 7.841, *p* < .001, *η²* = .05 | LowInn < MediumInn, HighInn |
| Child’s Emotional Difficulties at school | F(2, 308) = 1.581, *p* = .207, *η²* = .01 |  |
| Child’s Awareness of his/her difficulties | F(2, 308) = 2.581, *p* = .077, *η²* = .02 |  |
| Relationship with Teachers | F(2, 308) = 6.016, *p* = .003, *η²* = .04 | LowInn < HighInn |
| **QBS_TEACHERS** |  |  |  |
| Personal Experience in relation to the student’s difficulties | F(10, 512) = 1.547, *p* = .119, *η²* = .03 | // |  |
| Evaluation of Learning processes | // |  |
| Student’s Emotional Difficulties at school | // |  |
| Student’s Awareness of his/her difficulties | // |  |
| Relationship with Parents | // |  |

**Table 6**

*General Linear Model Between Parents' Innovation at School Measure and QBS Subscales*

| **QBS_STUDENTS** | Multivariate model | Univariate model | Tukey - Post-hoc |
| --- | --- | --- | --- |
| Satisfaction and Recognition of school results | F(10, 606) = 2.018, *p* = .029, *η²* = .03 | F(2, 308) = 3.129, *p* = .045, *η²* = .02 | MediumInn < HighInn |
| Relationships with Teachers | F(2, 308) = 2.858, *p* = .059, *η²* = .09 |  |
| Relationships with Classmates | F(2, 308) = 2.935, *p* = .055, *η²* = .02 |  |
| Emotional Attitude at School | F(2, 308) = 3.757, *p* = .024, *η²* = .02 | MediumInn < HighInn |
| Sense of Self-Efficacy | F(2, 308) = 2.359, *p* = .096, *η²* = .02 |  |
| **QBS_PARENTS** |  |  |  |
| Personal Experience in relation to the child's difficulties | F(10, 652) = 8.788, *p* < .001, *η²* = .12 | F(2, 331) = 14.978, *p* < .001, *η²* = .08 | LowInn < MediumInn < HighInn |
| Evaluation of Learning processes | F(2, 331) = 6.377, *p* = .002, *η²* = .04 | LowInn, MediumInn < HighInn |
| Child’s Emotional Difficulties at school | F(2, 331) = 5.527, *p* = .004, *η²* = .03 | LowInn < HighInn |
| Child’s Awareness of his/her difficulties | F(2, 331) = 11.454, *p* < .001, *η²* = .07 | LowInn < MediumInn < HighInn |
| Relationship with Teachers | F(2, 331) = 35.264, *p* < .001, *η²* = .18 | LowInn < MediumInn < HighInn |
| **QBS_TEACHERS** |  |  |  |
| Personal Experience in relation to the student’s difficulties | F(10, 346) = 1.261, *p* = .251, *η²* = .04 | // |  |
| Evaluation of Learning processes | // |  |
| Student’s Emotional Difficulties at school | // |  |
| Student’s Awareness of his/her difficulties | // |  |
| Relationship with Parents | // |  |
